# Supplementary material for: Designed DNA-Encoded IL-36 Gamma Acts as a Potent Molecular Adjuvant Enhancing Zika Synthetic DNA Vaccine-Induced Immunity and Protection in a Lethal Challenge Model
Source: PubMed Central journal article supplement (PMC6632123; doi:10.3390/vaccines7020042), 2019-05-22
Supplement: vaccines-07-00042-s001.pdf [file vaccines-07-00042-s001.pdf]

Article

# Designed DNA-Encoded IL-36 Gamma Acts As a Potent Molecular Adjuvant Enhancing Zika Synthetic DNA Vaccine-Induced Immunity and Protection in a Lethal Challenge Model

Lumena Louis <sup>1</sup>, Megan C Wise <sup>2</sup>, Hyeree Choi <sup>1</sup>, Daniel O Villarreal <sup>3</sup>, Kar Muthumani <sup>1</sup>, and David B Weiner

## Supplementary Materials

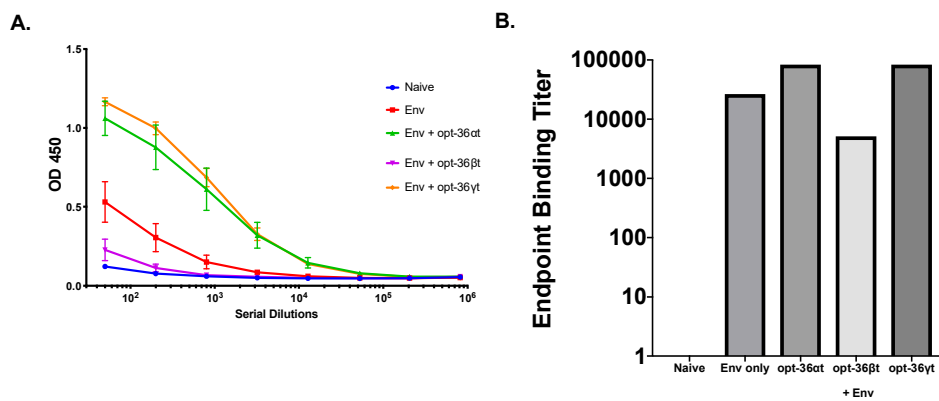

**Figure S1.** (A) ELISA analysis measuring binding antibody production (measured by OD450 values) in immunized mice. The C57BL/6 mice (n=5) were immunized intramuscularly three times three weeks apart with 2.5  $\mu$ g of HIV Env plasmid or 2.5  $\mu$ g of Env plasmid and 11  $\mu$ g of opt-36 $\alpha$ t, opt-36 $\beta$ t, or opt-36 $\gamma$ t. Binding to consensus C gp120 was analyzed with sera from animals post final vaccination. (B) Average endpoint titers.

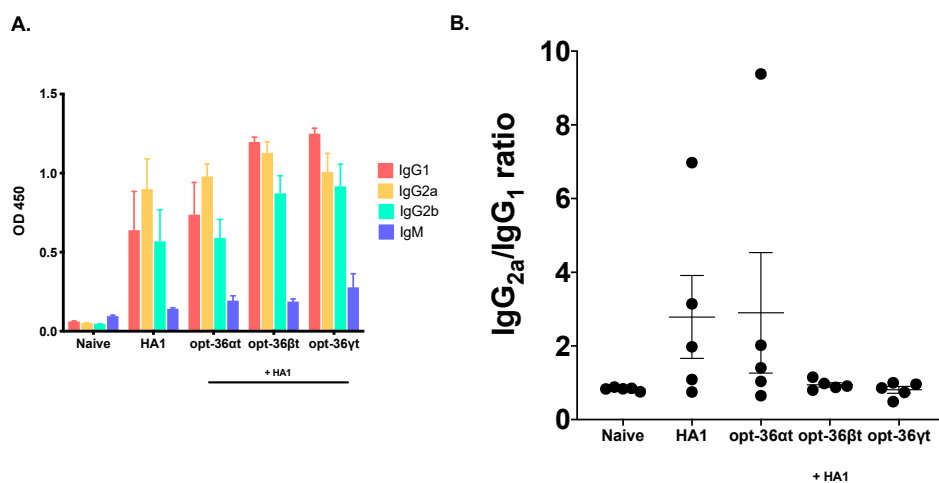

**Figure S2.** (A) ELISA analysis measuring isotype binding antibody production (measured by OD 450 values) in immunized mice. BALB/c mice (n=4-5) were immunized twice two weeks apart with 1  $\mu$ g of HA1 DNA plasmid or HA1 DNA plasmid and 11  $\mu$ g of opt-36 $\alpha$ t, opt-36 $\beta$ t, or opt-36 $\gamma$ t. Isotypes of antibodies generated were analyzed with sera from animals post final vaccination. (B) IgG<sub>2a</sub>/IgG<sub>1</sub> antibody ratio was analyzed by dividing the OD450 values of IgG<sub>2a</sub> by the OD450 values of IgG<sub>1</sub>.

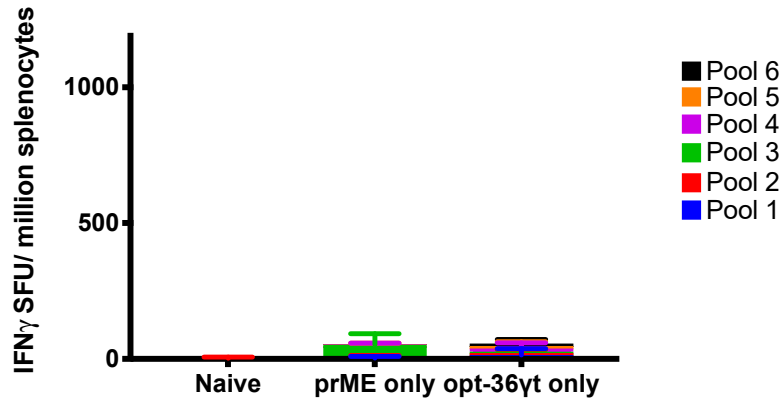

**Figure S3.** Induction of Zika specific cellular immune responses following vaccination with either Zika prME DNA vaccine alone or opt-36yt alone. ELISpot analysis measuring IFN- $\gamma$  secretion in splenocytes after one immunization.

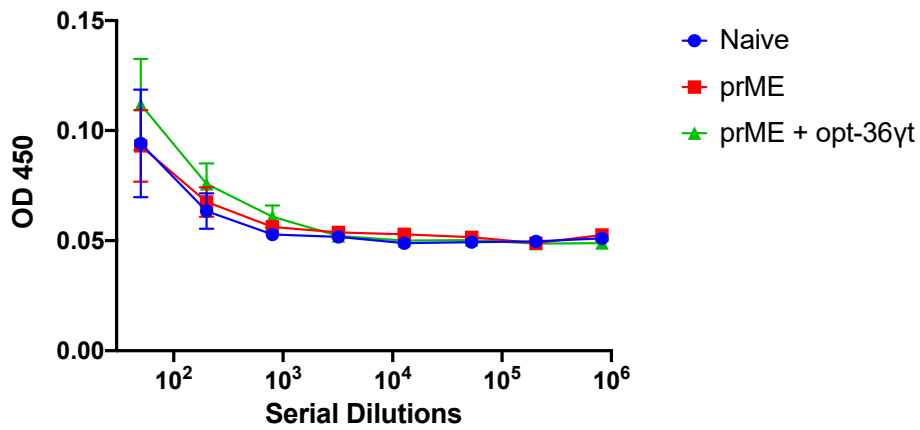

**Figure S4.** Induction of antigen specific antibody responses following immunization with either Zika prME DNA vaccine alone or Zika prME DNA vaccine and opt-36yt after one immunization.

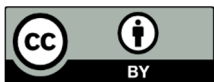

© 2019 by the authors. Submitted for possible open access publication under the terms and conditions of the Creative Commons Attribution (CC BY) license (<http://creativecommons.org/licenses/by/4.0/>).
